# Supplementary material for: Harnessing advances in computer simulation to inform policy and planning to reduce alcohol-related harms
Source: PubMed Central journal article supplement (PMC5938302; doi:10.1007/s00038-017-1041-y), 2017-10-19
Supplement: 38_2017_1041_MOESM3_ESM.pdf [file 38_2017_1041_MOESM3_ESM.pdf]

**Title:** *Harnessing advances in computer simulation to inform policy and planning to reduce alcohol-related harms*

**Journal:** *International Journal of Public Health*

**Authors:** Jo-An Atkinson<sup>a,b,c,d</sup>, Dylan Knowles, John Wiggers, Michael Livingston, Robin Room, Ante Prodan, Geoff McDonnell, Eloise O'Donnell, Sandra Jones, Paul S Haber, David Muscatello, Nadine Ezard, Nghi Phung, Louise Freebairn, Devon Indig, Lucie Rychetnik, Jaithri Ananthapavan, and Sonia Wutzke, on behalf of the alcohol modelling consortium.

**Affiliations of corresponding author:**

<sup>a</sup> Director, Decision Analytics, Sax Institute, Sydney, Australia

<sup>b</sup> The Australian Prevention Partnership Centre, Sax Institute, Sydney, Australia

<sup>c</sup> Sydney Medical School, University of Sydney, Australia

<sup>d</sup> Corresponding author: Decision Analytics, Sax Institute, PO Box K617, Haymarket, NSW, 1240, Australia, [Jo-An.Atkinson@saxinstitute.org.au](mailto:Jo-An.Atkinson@saxinstitute.org.au); Ph: +61 2 9188 9537; Fax: +61 2 9188 9501

## Online Resource 1: Summary of data sources and role of expert participants (NSW alcohol model)

| Types of content knowledge contributed by multi-disciplinary team                                                                                                                                                                                                                                                                                                                                                                                                                                                               | Types of literature and data used                                                                                                                                                                                                                                                                                                                                                                                                                                                                                                                                                                                                                                                                                                                                                                                                                                                                                                                                                                                                                                                                                                                                                                                                                                                                                                                                                                                                                                                                                                                                                                                                                                                                                                                                                                                                                                                                                                                                                                                                                                                                                                                                                                                                                                                                                                                                                                                                                                                                                                                                                                                                                                                                                                                                                                                                                                                                                                                                                      |
|---------------------------------------------------------------------------------------------------------------------------------------------------------------------------------------------------------------------------------------------------------------------------------------------------------------------------------------------------------------------------------------------------------------------------------------------------------------------------------------------------------------------------------|----------------------------------------------------------------------------------------------------------------------------------------------------------------------------------------------------------------------------------------------------------------------------------------------------------------------------------------------------------------------------------------------------------------------------------------------------------------------------------------------------------------------------------------------------------------------------------------------------------------------------------------------------------------------------------------------------------------------------------------------------------------------------------------------------------------------------------------------------------------------------------------------------------------------------------------------------------------------------------------------------------------------------------------------------------------------------------------------------------------------------------------------------------------------------------------------------------------------------------------------------------------------------------------------------------------------------------------------------------------------------------------------------------------------------------------------------------------------------------------------------------------------------------------------------------------------------------------------------------------------------------------------------------------------------------------------------------------------------------------------------------------------------------------------------------------------------------------------------------------------------------------------------------------------------------------------------------------------------------------------------------------------------------------------------------------------------------------------------------------------------------------------------------------------------------------------------------------------------------------------------------------------------------------------------------------------------------------------------------------------------------------------------------------------------------------------------------------------------------------------------------------------------------------------------------------------------------------------------------------------------------------------------------------------------------------------------------------------------------------------------------------------------------------------------------------------------------------------------------------------------------------------------------------------------------------------------------------------------------------|
| <ul style="list-style-type: none"> <li>• Alcohol and its mechanisms of effect;</li> <li>• Determinants and mediators of alcohol consumption and misuse;</li> <li>• Individual and public health treatments, interventions, programs and their effect;</li> <li>• Current policy contexts and decision processes;</li> <li>• Availability of, and access to, data sources and evidence;</li> <li>• Strengths and limitations of available data sources;</li> <li>• Prioritisation of mechanisms, factors, treatments.</li> </ul> | <p><b>National and state data, for example:</b></p> <p>Demographic data from the Australian Bureau of Statistics</p> <p>Administrative datasets from Centre for Epidemiology and Evidence. HealthStats NSW. Sydney: NSW Ministry of Health. Available at: <a href="http://www.healthstats.nsw.gov.au">www.healthstats.nsw.gov.au</a>. Accessed [July 2015].</p> <p>Burden of disease data from Begg S, Vos T, Barker B, et al. Burden of disease and injury in Australia, 2003. Cat. no. PHE 82 Canberra: Australian Institute of Health and Welfare <a href="http://www.aihw.gov.au/publications/index.cfm/title/10317">http://www.aihw.gov.au/publications/index.cfm/title/10317</a>, 2007.</p> <p><b>Survey data, for example:</b></p> <p>Australian Institute of Health and Welfare. National Drug Strategy Household Survey detailed report: 2013. Canberra. Available at: <a href="http://www.aihw.gov.au/publication-detail/?id=60129549469">http://www.aihw.gov.au/publication-detail/?id=60129549469</a> 2014.</p> <p>Tindall J, Groombridge D, Wiggers J, et al. Alcohol-related crime in city entertainment precincts: Public perception and experience of alcohol-related crime and support for strategies to reduce such crime. Drug and alcohol review 2015.</p> <p><b>Longitudinal data, for example:</b></p> <p>Becker et al 1996, Prediction of risk of liver disease by alcohol intake, sex, and age: A prospective population study. Hepatology Journal 23(5): 1025</p> <p><b>Accepted formulas, for example:</b></p> <p>Widmark equation for Blood Alcohol Concentration: Widmark, E.M.P., Principles and Applications of Medicolegal Alcohol Determination, Davis, CA: Biomedical Publications, 1981, pp. 107-108.</p> <p><b>Well supported theoretical models, for example:</b></p> <p>Michie S, van Stralen MM, West R. The behaviour change wheel: a new method for characterising and designing behaviour change interventions. Implementation science : IS. 2011;6:42.</p> <p><b>Systematic reviews and meta-analyses, for example:</b></p> <p>Corrao et al 2004. A meta-analysis of alcohol consumption and the risk of 15 diseases. Prev Med 38: 613-19</p> <p>Martineau et al. (2013). Population-level interventions to reduce alcohol-related harm: An overview of systematic reviews. Preventive Medicine 2013; 57: 278-296</p> <p>International Center for Alcohol Policies. Determinants of drinking. ICAP Health Issues (Online). Available: <a href="http://www.icap.org/linkclick.aspx?fileticket=oHFi97riJos%3d&amp;tabid=243">http://www.icap.org/linkclick.aspx?fileticket=oHFi97riJos%3d&amp;tabid=243</a>, 2009.</p> <p><b>Economic data, for example:</b></p> <p>Donnelly N, Scott L, Poyton S, et al. Estimating the short-term cost of police time spent dealing with alcohol-related crime in NSW. Monograph Series No 25. Tasmania: National Drug Law Enforcement Research Fund; An Initiative of the National Drug Strategy, 2007.</p> |
