# Supplementary material for: Harnessing advances in computer simulation to inform policy and planning to reduce alcohol-related harms
Source: PubMed Central journal article supplement (PMC5938302; doi:10.1007/s00038-017-1041-y), 2017-10-19
Supplement: 38_2017_1041_MOESM4_ESM.pdf [file 38_2017_1041_MOESM4_ESM.pdf]

**Title:** *Harnessing advances in computer simulation to inform policy and planning to reduce alcohol-related harms*

**Journal:** *International Journal of Public Health*

**Authors:** Jo-An Atkinson<sup>a,b,c</sup>, Dylan Knowles, John Wiggers, Michael Livingston, Robin Room, Ante Prodan, Geoff McDonnell, Eloise O'Donnell, Sandra Jones, Paul S Haber, David Muscatello, Nadine Ezard, Nghi Phung, Louise Freebairn, Devon Indig, Lucie Rychetnik, Jaithri Ananthapavan, and Sonia Wutzke, on behalf of the alcohol modelling consortium.

**Affiliations of corresponding author:**

<sup>a</sup> The Australian Prevention Partnership Centre, Sax Institute, Sydney, Australia

<sup>b</sup> Sydney Medical School, University of Sydney, Australia

<sup>c</sup> Corresponding author: The Australian Prevention Partnership Centre, Sax Institute, PO Box K617, Haymarket, NSW, 1240, Australia, [Jo-An.Atkinson@saxinstitute.org.au](mailto:Jo-An.Atkinson@saxinstitute.org.au); Ph: +61 2 9188 9537; Fax: +61 2 9188 9501

## Online Resource 4: Data processing method (NSW alcohol model)

### Data Processing Methodology

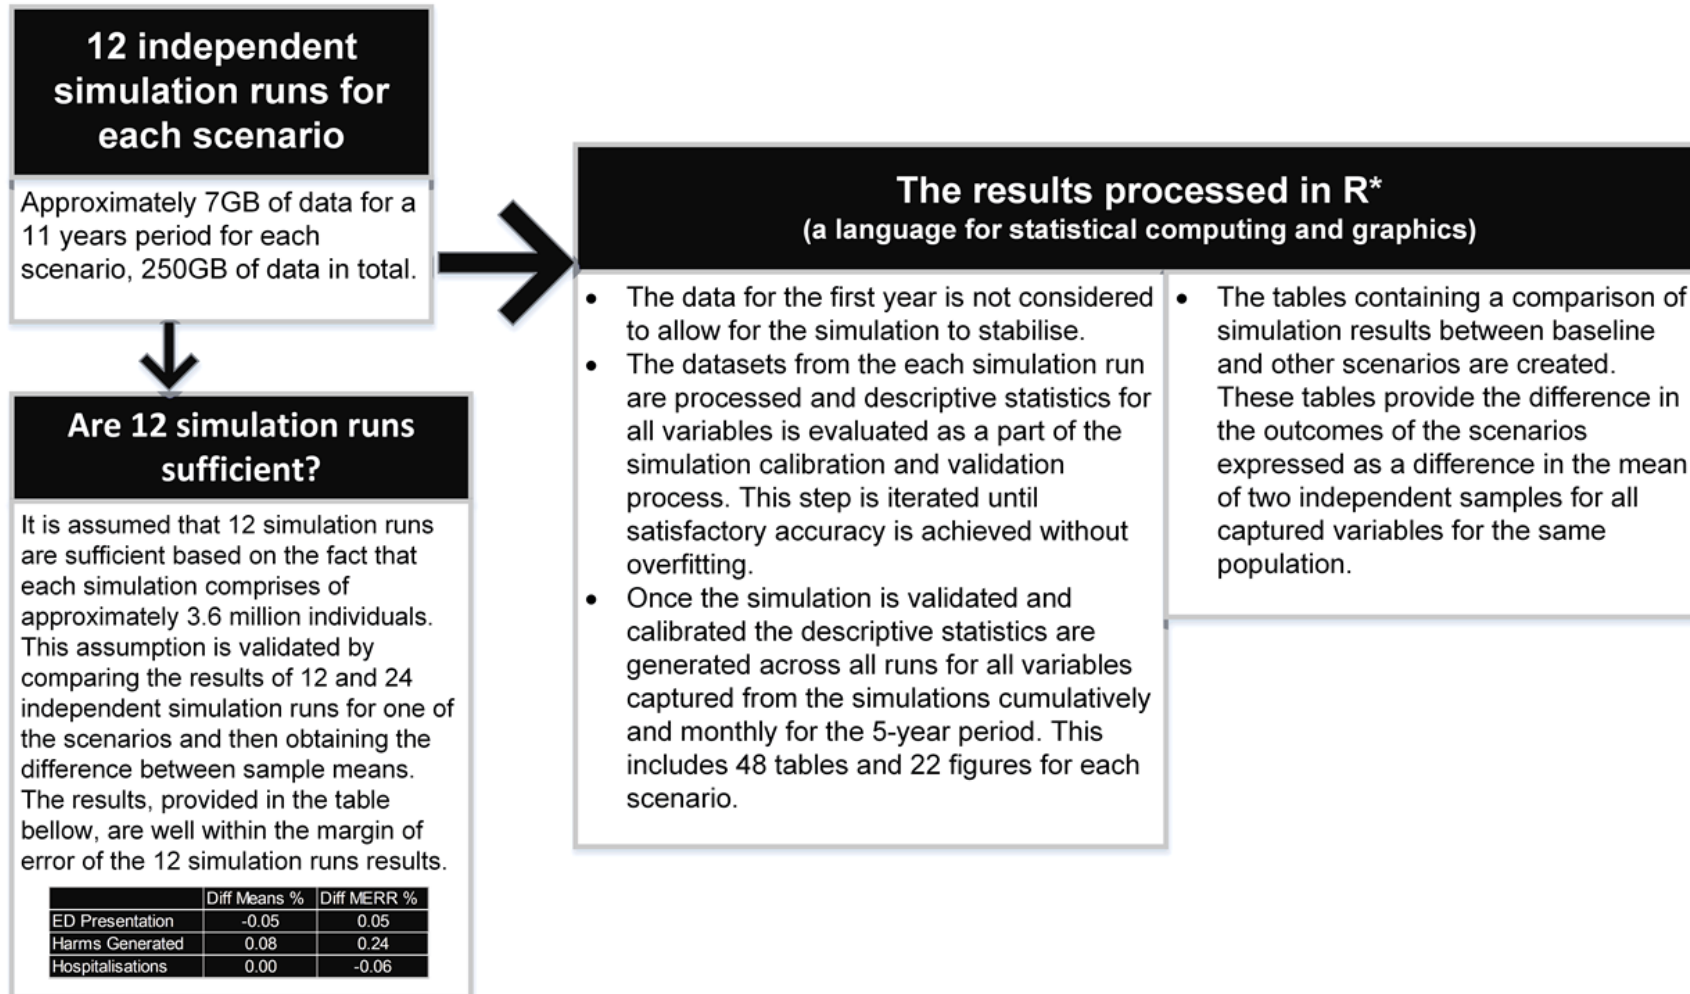

\*R Core Team (2012). R: A language and environment for statistical computing. R Foundation for Statistical Computing, Vienna, Austria. ISBN 3-900051-07-0, URL <http://www.R-project.org/>
